# Supplementary material
Source: PubMed Central journal article supplement (PMC8832206)
Supplement: msy-0013-0012-s04.pdf [file msy-0013-0012-s04.pdf]

**Supplementary Table. List of homozygously shared variants ( $\geq 20$  X) with three affected patients in family (III:1, III:4, III:5) and not in homozygous in healthy brother (III:8). Alteration in the *BEND4* gene (c.1297G>A, p.Gly433Ser, rs779411414) is the only variant with unknown frequency data in populations, shown with red borderline.**

| ReadDepth | Chr | Position<br>GRCh37/hg19 | Ref->Seq | dbSNP       | Gene       | Transcript | VarSome       | Frequency        |                    |
|-----------|-----|-------------------------|----------|-------------|------------|------------|---------------|------------------|--------------------|
|           |     |                         |          |             |            |            |               | gnomAD-<br>Exoms | gnomAD-<br>Genomes |
| 31        | 1   | 90486412                | T->G     | rs2816881   | ZNF326     | 455342     | Benign        | 0.6300           | 0.6183             |
| 113       | 1   | 110086451               | G->A     | rs17575798  | GPR61      | 404129     | Benign        | 0.2076           | 0.1807             |
| 52        | 1   | 110091271               | C->T     | rs3737182   | GPR61      | 404129     | Benign        | -                | 0.1854             |
| 113       | 1   | 110151395               | G->T     | rs3738766   | GNAT2      | 351050     | Benign        | 0.05037          | 0.03229            |
| 46        | 1   | 110162918               | T->C     | rs28362580  | AMPD2      | 342115     | Benign        | 0.1100           | 0.09815            |
| 76        | 1   | 110741086               | C->T     | rs41306175  | SLC6A17    | 331565     | Benign        | 0.07288          | 0.08146            |
| 71        | 1   | 110766454               | G->A     | rs59123361  | KCNC4      | 369787     | Benign        | 0.08264          | 0.07083            |
| 71        | 1   | 110882444               | A->G     | rs814771    | RBM15      | 369784     | Benign        | 0.7588           | 0.7911             |
| 45        | 1   | 110949720               | C->T     | rs6671673   | HBXIP      | 483260     | Benign        | 0.5689           | 0.5894             |
| 22        | 1   | 111857087               | C->T     | rs2786151   | CHIA       | 369740     | Benign        | -                | 0.5429             |
| 28        | 1   | 111861714               | T->A     | rs2786161   | CHIA       | 369740     | Benign        | 0.6219           | 0.6574             |
| 73        | 1   | 111861841               | A->G     | rs2275253   | CHIA       | 353665     | Benign        | 0.6397           | 0.6950             |
| 47        | 1   | 111861974               | T->C     | rs2275254   | CHIA       | 369740     | Benign        | 0.5012           | 0.4883             |
| 57        | 1   | 111862952               | T->G     | rs2256721   | CHIA       | 369740     | Benign        | 0.6394           | 0.6943             |
| 39        | 1   | 112251983               | C->G     | rs3738300   | RAP1A      | 436150     | Benign        | 0.3017           | 0.3017             |
| 66        | 1   | 119466275               | A->G     | rs4659129   | TBX15      | 344218     | Benign        | 0.6621           | 0.6559             |
| 242       | 1   | 144994861               | C->T     | rs2442640   | PDE4DIP    | 530472     | VUS           | -                | 0.5336             |
| 122       | 1   | 150445819               | A->G     | rs7002      | RPRD2      | 369068     | Benign        | 0.3447           | 0.3002             |
| 72        | 1   | 150477061               | C->T     | rs3738487   | ECM1       | 498579     | Benign        | 0.3405           | 0.2998             |
| 178       | 1   | 150484987               | G->A     | rs13294     | ECM1       | 498579     | Benign        | 0.3521           | 0.3317             |
| 158       | 1   | 152538358               | G->C     | rs17659359  | LCE3E      | 368789     | Benign        | 0.2695           | 0.2246             |
| 133       | 2   | 42989994                | G->T     | rs2278585   | OXER1      | 378661     | Benign        | -                | 0.2356             |
| 166       | 2   | 42990010                | C->A     | rs12617777  | OXER1      | 378661     | Benign        | 0.2914           | 0.2942             |
| 229       | 2   | 42990101                | G->C     | rs2278586   | OXER1      | 378661     | Benign        | 0.2721           | 0.2360             |
| 93        | 2   | 42990522                | C->T     | rs12712859  | OXER1      | 378661     | Benign        | 0.2753           | 0.2407             |
| 111       | 2   | 42991200                | C->G     | rs34142793  | OXER1      | 378661     | Likely Benign | 0.02440          | 0.01810            |
| 23        | 2   | 45780962                | C->G     | rs3816107   | SRBD1      | 493649     | Benign        | -                | 0.5751             |
| 43        | 2   | 46739157                | A->G     | rs3814045   | ATP6V1E2   | 524249     | Benign        | 0.4338           | 0.4283             |
| 33        | 2   | 46818992                | C->T     | rs17818315  | PIGF       | 412717     | Benign        | -                | 0.2228             |
| 39        | 2   | 46987139                | G->A     | rs17771838  | SOC55      | 306503     | Benign        | 0.08340          | 0.06805            |
| 36        | 4   | 37666976                | C->G     | rs6855306   | RELL1      | 454158     | Benign        | 0.08654          | 0.1020             |
| 72        | 4   | 37962133                | G->A     | rs2290740   | PTTG2      | 504686     | Benign        | 0.1669           | 0.1804             |
| 92        | 4   | 42122161                | C->T     | rs779411414 | BEND4      | 504360     | VUS           | -                | -                  |
| 53        | 8   | 142170884               | C->T     | rs2289001   | DENND3     | 519811     | Benign        | 0.3357           | 0.2703             |
| 75        | 8   | 142445680               | A->T     | rs11784911  | PTP4A3     | 349124     | Benign        | -                | 0.4267             |
| 45        | 8   | 142458053               | A->G     | rs6578185   | AC100803.1 | 523857     | Benign        | 0.4316           | 0.4297             |
| 33        | 8   | 142505057               | G->T     | rs2246586   | AC100803.1 | 523857     | Benign        | 0.3373           | 0.3132             |
| 81        | 8   | 142517222               | A->G     | rs2748421   | AC100803.1 | 523857     | Benign        | 0.4157           | 0.4068             |
| 86        | 8   | 142517227               | C->T     | rs2613648   | AC100803.1 | 523857     | Benign        | 0.4156           | 0.4064             |
| 83        | 8   | 143399860               | G->T     | rs56055628  | TSNARE1    | 524325     | Benign        | 0.2075           | 0.1835             |

|     |    |           |        |            |            |        |               |         |         |
|-----|----|-----------|--------|------------|------------|--------|---------------|---------|---------|
| 48  | 8  | 144732026 | G -> A | rs3750203  | ZNF623     | 328466 | Benign        | 0.5275  | 0.4842  |
| 31  | 8  | 146156247 | C -> A | rs3735789  | ZNF16      | 532351 | Benign        | 0.2587  | 0.2956  |
| 47  | 8  | 146157339 | T -> C | rs3735787  | ZNF16      | 532351 | Benign        | 0.2407  | 0.2250  |
| 50  | 8  | 146171285 | G -> A | rs3824110  | ZNF16      | 532351 | Benign        | 0.2322  | 0.2436  |
| 44  | 8  | 146171437 | A -> G | rs3735785  | ZNF16      | 532351 | Benign        | 0.2426  | 0.2380  |
| 58  | 8  | 146203412 | A -> G | rs2979109  | ZNF252     | 426361 | Benign        | 0.4616  | 0.5452  |
| 95  | 11 | 70118251  | T -> G | rs670012   | PPFIA1     | 253925 | Benign        | 0.3829  | 0.4725  |
| 75  | 11 | 70208311  | G -> A | rs7130178  | PPFIA1     | 253925 | Benign        | 0.3810  | 0.4721  |
| 35  | 11 | 70222604  | G -> A | rs664130   | AP000487.5 | 530690 | Benign        | 0.2193  | 0.2086  |
| 66  | 11 | 70229171  | G -> A | rs552282   | AP000487.5 | 530690 | Benign        | 0.3353  | 0.4313  |
| 103 | 11 | 70253586  | T -> C | rs569732   | CTTN       | 301843 | Benign        | 0.4332  | 0.5296  |
| 117 | 11 | 70279766  | C -> T | rs643301   | CTTN       | 301843 | Benign        | 0.1994  | 0.2144  |
| 28  | 13 | 110435231 | C -> T | rs1805097  | IRS2       | 375856 | Benign        | 0.3500  | 0.2964  |
| 43  | 13 | 110435953 | A -> G | rs4773092  | IRS2       | 375856 | Benign        | 0.5869  | 0.6106  |
| 98  | 13 | 110436232 | G -> A | rs3742210  | IRS2       | 375856 | Benign        | 0.5843  | 0.6034  |
| 29  | 13 | 111090909 | T -> C | rs7984937  | COL4A2     | 257309 | Benign        | 0.2842  | 0.3449  |
| 37  | 13 | 111090924 | G -> A | rs7984100  | COL4A2     | 257309 | Benign        | 0.2818  | 0.3377  |
| 67  | 13 | 111114554 | G -> A | rs41275110 | COL4A2-AS2 | 458403 | Benign        | 0.1646  | 0.1818  |
| 23  | 13 | 111121620 | C -> T | rs9583500  | COL4A2-AS2 | 458403 | Benign        | 0.1751  | 0.2193  |
| 40  | 13 | 111145676 | G -> C | rs2391833  | COL4A2     | 360467 | Benign        | 0.5156  | 0.4433  |
| 65  | 16 | 4714639   | T -> C | rs1659479  | MGRN1      | 536343 | Benign        | -       | 0.5035  |
| 91  | 16 | 4718388   | A -> G | rs34069734 | MGRN1      | 536343 | Benign        | -       | 0.4183  |
| 71  | 16 | 4721468   | T -> C | rs715109   | MGRN1      | 536343 | Benign        | 0.5738  | 0.5890  |
| 60  | 16 | 4723451   | A -> G | rs2289314  | MGRN1      | 536343 | Benign        | 0.4991  | 0.5114  |
| 99  | 16 | 4796393   | A -> G | rs737700   | ZNF500     | 545009 | Benign        | 0.6184  | 0.6208  |
| 41  | 16 | 4797457   | C -> T | rs17853375 | ZNF500     | 545009 | Benign        | 0.5441  | 0.4748  |
| 30  | 16 | 4812209   | G -> A | rs12599765 | ZNF500     | 545009 | Benign        | -       | 0.5462  |
| 84  | 19 | 804456    | G -> A | rs351980   | PTBP1      | 349038 | Benign        | 0.1290  | 0.1662  |
| 109 | 19 | 885818    | A -> G | rs1060442  | MED16      | 395808 | Benign        | 0.5962  | 0.6122  |
| 35  | 19 | 984533    | T -> C | rs2301810  | WDR18      | 251289 | Benign        | 0.4845  | 0.4958  |
| 51  | 19 | 990394    | T -> C | rs2240148  | WDR18      | 251289 | Benign        | 0.4854  | 0.5132  |
| 135 | 19 | 1095336   | C -> T | rs1046041  | POLR2E     | 215587 | Benign        | 0.5645  | 0.6171  |
| 110 | 19 | 1391059   | G -> T | rs2074896  | NDUFS7     | 538662 | Benign        | 0.07837 | 0.04933 |
| 70  | 19 | 1397504   | C -> T | rs2074899  | NDUFS7     | 538662 | Benign        | 0.07685 | 0.03497 |
| 140 | 19 | 1507483   | T -> C | rs791460   | ADAMTSL5   | 330475 | Benign        | -       | 0.3798  |
| 25  | 19 | 1534042   | T -> C | rs10853954 | PLK5       | 454744 | Benign        | 0.3034  | 0.2507  |
| 106 | 19 | 2040061   | T -> C | rs56197957 | MKMK2      | 541165 | Benign        | -       | 0.2788  |
| 41  | 19 | 2717256   | C -> G | rs3745812  | DIRAS1     | 323469 | Benign        | 0.1872  | 0.1479  |
| 56  | 19 | 2732986   | T -> C | rs759073   | SLC39A3    | 455372 | Benign        | 0.5095  | 0.5868  |
| 41  | 19 | 2761603   | C -> T | rs3745815  | SGTA       | 221566 | Benign        | -       | 0.1958  |
| 39  | 19 | 2762585   | A -> C | rs2302491  | SGTA       | 221566 | Benign        | 0.3237  | 0.3539  |
| 127 | 19 | 2790394   | G -> A | rs1736176  | THOP1      | 307741 | Benign        | 0.3295  | 0.3416  |
| 55  | 19 | 2796021   | G -> A | rs1736180  | THOP1      | 307741 | Benign        | 0.3222  | 0.3389  |
| 82  | 19 | 2812153   | A -> G | rs941407   | THOP1      | 307741 | Benign        | 0.3471  | 0.4201  |
| 35  | 19 | 3186085   | G -> T | rs11551095 | NCLN       | 246117 | Benign        | 0.5279  | 0.5317  |
| 57  | 19 | 8999453   | C -> T | rs11085765 | MUC16      | 380947 | Likely Benign | 0.5344  | 0.4688  |
